# Supplementary material for: Collaborative improvement project to decrease maternal mortality rate across five hospitals in Saudi Arabia
Source: HighWire-hosted journal article supplement (doi:10.1136/bmjoq-2022-002024), 2022-11-01
Supplement: bmjoq-2022-002024supp010_data_supplement.pdf [file bmjoq-2022-002024supp010_data_supplement.pdf]

**Appendix 10. Maternal safety boards in Hospitals B**

|                                                       |                                                                                                                                                        |                                                                                                                                                                                                                                                             |                                                 |
|-------------------------------------------------------|--------------------------------------------------------------------------------------------------------------------------------------------------------|-------------------------------------------------------------------------------------------------------------------------------------------------------------------------------------------------------------------------------------------------------------|-------------------------------------------------|
| Number of patient recived > 4u PRBCs<br>2             | <b>Maternal safety board</b>                                                                                                                           |                                                                                                                                                                                                                                                             | Number of Incident Report<br>4                  |
| Number of patient un planned transfer to ICU-HDU<br>2 | Date:<br>17/6/2020<br>24/6/2020                                                                                                                        | Cases flagged by ACOG Criteria<br>- 5 unit PRBC, 4 FFP, 1 platelet<br>- Hysterectomy<br>- admitted to HDU<br>- 12 unit PRBC, 6 unit FFP + platelet<br>- Hysterectomy<br>- admitted to ICU<br>- Hysterectomy, Shunt → Gabe Hsu<br>- Vascular → two ligatures | Number of Adverse event report<br>2             |
| Quarterly MR %<br>-                                   |                                                                                                                                                        | Next Morbidity Review Date<br>23/6/2020                                                                                                                                                                                                                     | Number of safety walk- rounds<br>7              |
| Number of Near misses<br>-                            | Practice Issue for improvement:<br>1- improve Emcs documentation<br>2- improve hand over documentation<br>3- improve maternal hemorrhage pathway in OR |                                                                                                                                                                                                                                                             | Number of maternal hemorrhage assimilation<br>1 |
